# Supplementary material
Source: publisher figshare collection journal article supplement (https://tandf.figshare.com/ndownloader/files/14221988)
Supplement: Supplementary file 1 [file 14221988]

**Supporting Information**  
**Hydrogen oxidation on oxygen-rich IrO<sub>2</sub>(110)**

T. Li,<sup>1,†</sup> M. Kim,<sup>2,†</sup> Z. Liang,<sup>1</sup> A. Asthagiri<sup>2</sup> and J.F. Weaver<sup>1</sup>

<sup>1</sup>Department of Chemical Engineering, University of Florida, Gainesville, FL 32611, USA

<sup>2</sup>William G. Lowrie Chemical & Biomolecular Engineering, The Ohio State University, Columbus, OH 43210, USA

<sup>†</sup> Tao Li and Minkyu Kim contributed equally to this work.

\*To whom correspondence should be addressed, [weaver@che.ufl.edu](mailto:weaver@che.ufl.edu)

Tel. 352-392-0869, Fax. 352-392-9513

## Estimates of adsorbate coverage and product yields from TPRS

We estimate atomic oxygen coverages by scaling integrated O<sub>2</sub> TPD spectra with those obtained from a saturated (2 × 1)-O layer containing 0.50 ML of O-atoms and prepared by exposing the Ir(100)-(5 × 1) surface to O<sub>2</sub> in UHV [1]. To estimate hydrogen coverages, we scaled integrated hydrogen desorption spectra by an integrated TPD spectrum collected from a saturated Ir(100)-(5 × 1)-H layer containing 0.80 ML of atomic hydrogen that we prepared by adsorbing hydrogen to saturation on the Ir(100)-(5 × 1) surface at 300 K [2]. We performed TPRS experiments of CO oxidation on saturated O-covered Ir(100) to estimate CO<sub>2</sub> desorption yields. Specifically, we collected O<sub>2</sub> and CO<sub>2</sub> TPRS spectra after exposing a (2 × 1)-O layer to a sub-saturation dose of CO and assuming that the CO<sub>2</sub> yield is equal to the difference between the initial (0.50 ML) and final coverages of oxygen as determined from the O<sub>2</sub> TPRS yield. We performed TPRS experiments of hydrogen oxidation on partially O-covered Ir(100) to estimate the H<sub>2</sub>O desorption yields. In these experiments, we first collected O<sub>2</sub> and CO<sub>2</sub> TPRS spectra after exposing a (2 × 1)-O layer to a sub-saturation dose of CO and assuming that the oxygen remaining on Ir(100) is equal to the difference between the initial oxygen coverage in the (2 × 1)-O layer (0.50 ML) and the CO<sub>2</sub> yield determined from the CO<sub>2</sub> TPRS spectrum. We then collected O<sub>2</sub> and H<sub>2</sub>O TPRS spectra after exposing the partially O-covered Ir(100) surface generated from the first step to a saturation dose of H<sub>2</sub> and assuming that the H<sub>2</sub>O yield is equal to the difference between the initial and final coverage of oxygen determined from the O<sub>2</sub> TPRS yield. We repeat these calibration TPRS experiments to ensure accuracy in our estimates of desorption yields.

## H<sub>2</sub>O TPD spectra obtained from O<sub>2</sub>-exposed IrO<sub>2</sub>(110) at 85 K

Figure S1 shows H<sub>2</sub>O TPRS spectra obtained after adsorbing O<sub>2</sub> on IrO<sub>2</sub>(110) at 85 K, where the H<sub>2</sub>O was produced by reaction between O<sub>ot</sub> atoms and H<sub>2</sub> that adsorbed from the vacuum background before or during O<sub>2</sub> adsorption. An average of  $0.11 \pm 0.02$  ML of H<sub>2</sub>O desorbs from the O<sub>2</sub>-exposed surfaces. Because the background-adsorbed hydrogen is the limiting reactant for the O<sub>ot</sub> coverages studied, we assume that the initial O<sub>ot</sub> coverage is equal to the sum of H<sub>2</sub>O and O<sub>2</sub> that desorbs. Experiments with <sup>18</sup>O<sub>ot</sub>-covered IrO<sub>2</sub>(110) support our approach for computing the initial O<sub>ot</sub> coverages.

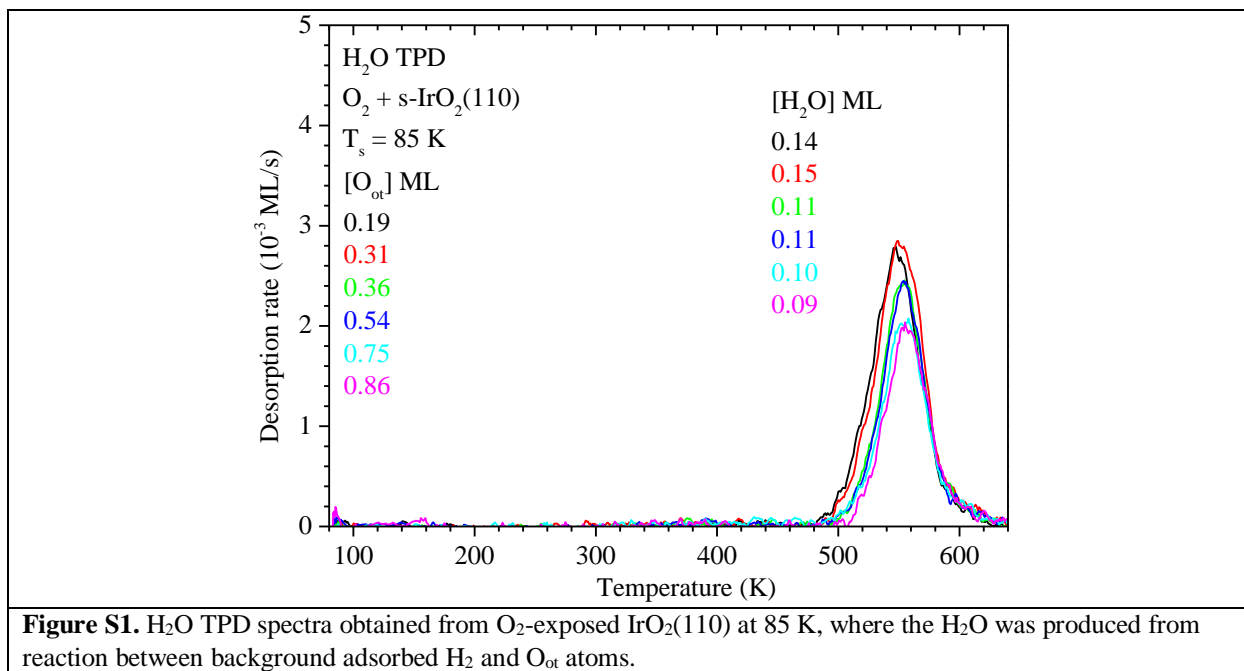

## **H<sub>2</sub>O TPD spectra from s-IrO<sub>2</sub>(110) after H<sub>2</sub>O adsorption at 85 K**

We investigated H<sub>2</sub>O adsorption on IrO<sub>2</sub>(110) using TPD to aid in interpreting the H<sub>2</sub>O desorption features that result from H<sub>2</sub> oxidation on O-rich IrO<sub>2</sub>(110) (Figure S2). After adsorbing 2-3 ML of H<sub>2</sub>O on IrO<sub>2</sub>(110) at 85 K, the H<sub>2</sub>O TPD spectrum exhibits a broad feature with a maximum near 500 K as well as sharper peaks at 200 and 170 K. Based on similarities with TPD spectra reported for H<sub>2</sub>O-covered RuO<sub>2</sub>(110) [3] and PdO(101) [4], we attribute the broad feature ( $\alpha$ ) to H<sub>2</sub>O species chemisorbed either associatively or dissociatively on Ir<sub>cus</sub> sites while the peaks at 200 K and 170 K are consistent with H<sub>2</sub>O adsorbed on O<sub>br</sub> sites and an initial H<sub>2</sub>O multilayer, respectively. Figure 3 shows that the water-Ir<sub>cus</sub> species on IrO<sub>2</sub>(110) desorb in a peak ( $\alpha_1$ ) at ~520 K at low coverage and that a broad shoulder ( $\alpha_0$ ) develops on the leading edge of the  $\alpha_1$  peak with increasing H<sub>2</sub>O coverage. The  $\alpha$  TPD feature saturates at an H<sub>2</sub>O coverage of ~1 ML, i.e., one H<sub>2</sub>O molecule per Ir<sub>cus</sub> atom, further supporting the assignment of this feature to water species adsorbed on the Ir<sub>cus</sub> atoms.

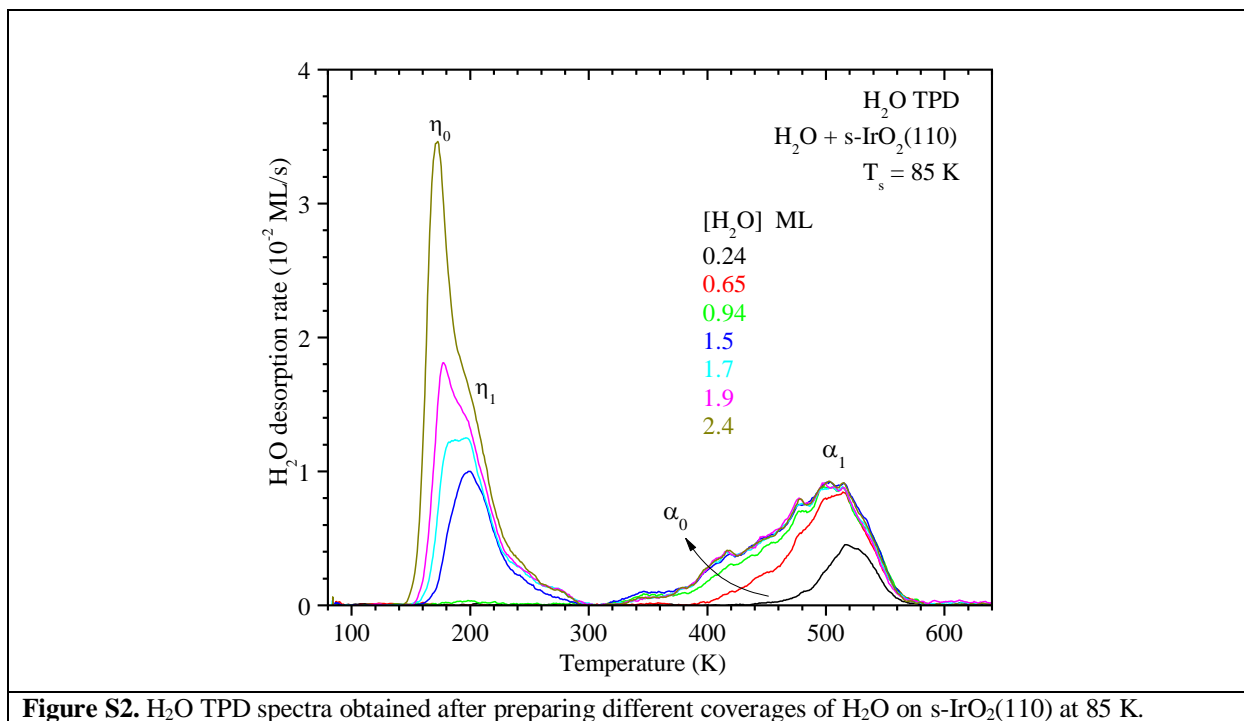

A prior study reports that the TPD feature from chemisorbed H<sub>2</sub>O on PdO(101) exhibits a broadening that is similar to that observed here [4]. Those authors report that H<sub>2</sub>O molecules prefer to adsorb as H-bonded H<sub>2</sub>O-HO dimer complexes on the Pd<sub>cus</sub> sites, but that a variety of less stable H<sub>2</sub>O oligomers can develop on the Pd<sub>cus</sub> rows at H<sub>2</sub>O coverages above 0.50 ML, with desorption from the oligomer structures producing a broad shoulder in the TPD spectra. A preference for H<sub>2</sub>O-HO dimer formation has also been reported for water adsorption on s-RuO<sub>2</sub>(110)[5,6] and crystalline Fe<sub>3</sub>O<sub>4</sub> surfaces [7]. Below, we report DFT calculations which predict that H<sub>2</sub>O dissociative chemisorption is moderately favored over H<sub>2</sub>O-HO dimer formation on s-IrO<sub>2</sub>(110). This prediction suggests that the composition of the water adlayer evolves differently with increasing coverage on IrO<sub>2</sub>(110) compared with PdO(101) and RuO<sub>2</sub>(110); however, a shared characteristic among these oxide surfaces is that chemisorbed water becomes destabilized with increasing H<sub>2</sub>O coverage. Further characterization using surface vibrational and/or photoelectron

spectroscopy is needed to determine the structure and composition of the water adlayer on  $\text{IrO}_2(110)$ .

### TPRS for $\text{H}_2$ oxidation on $\text{IrO}_2(110)$ with $\text{O}_{\text{ot}}$ -layer prepared at 300 K

Figure S3 shows  $\text{H}_2$  and  $\text{H}_2\text{O}$  TPRS spectra obtained after exposing a saturation amount of  $\text{H}_2$  to  $\text{IrO}_2(110)$  surfaces with different initial  $\text{O}_{\text{ot}}$  coverages. We prepared the  $\text{O}_{\text{ot}}$ -layers by exposing the  $\text{IrO}_2(110)$  surface to varying amounts of  $\text{O}_2$  at a surface temperature of 300 K. The TPRS traces evolve with the  $\text{O}_{\text{ot}}$ -coverage in a qualitatively similar way as when the  $\text{O}_{\text{ot}}$ -layer is prepared by flashing a saturated on-top oxygen layer to selected temperatures (Figure 3a, main manuscript).

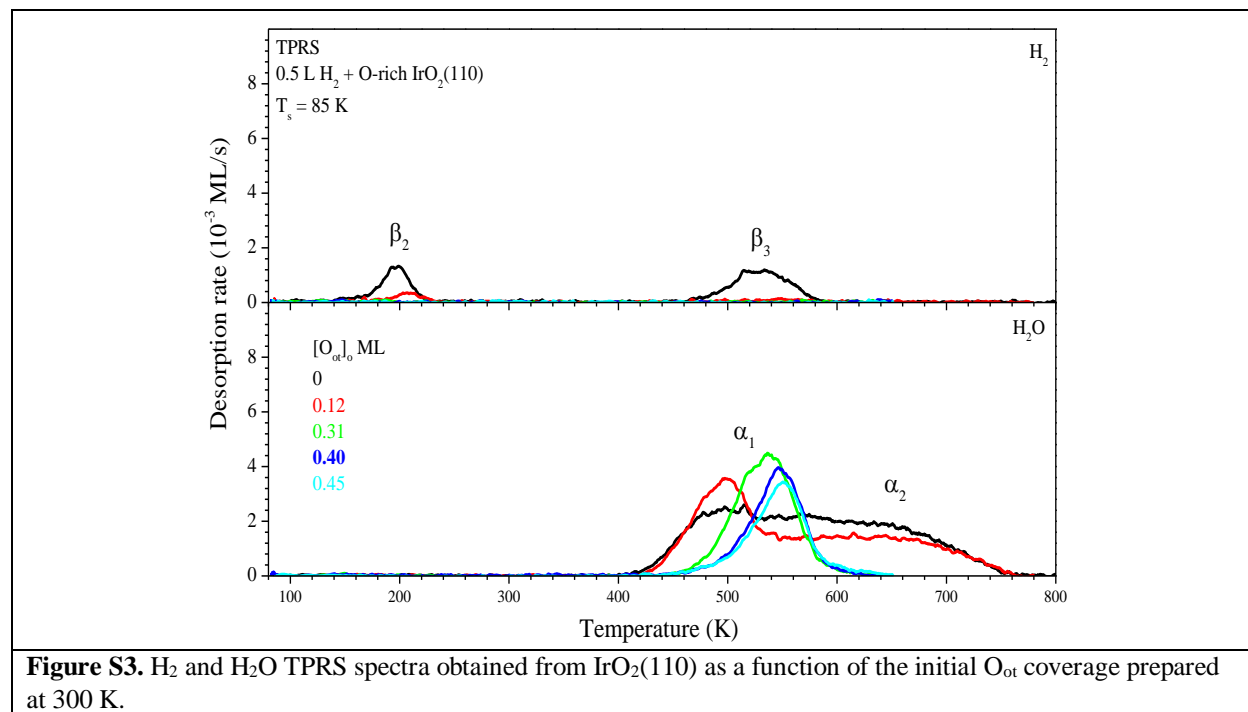

**Figure S3.**  $\text{H}_2$  and  $\text{H}_2\text{O}$  TPRS spectra obtained from  $\text{IrO}_2(110)$  as a function of the initial  $\text{O}_{\text{ot}}$  coverage prepared at 300 K.

## H<sub>2</sub> oxidation yields as a function of initial O<sub>ot</sub> coverage prepared by heating to selected temperatures vs. O<sub>2</sub> adsorption at 300 K

Figures S4a and S4b show H<sub>2</sub> and H<sub>2</sub>O TPRS yields as a function of the initial on-top oxygen coverage for two methods of preparing the oxygen layer, namely, heating a saturated oxygen layer to selected temperatures (Fig. S4a and Fig. 4c) and varying the O<sub>2</sub> exposure to IrO<sub>2</sub>(110) at a surface temperature of 300 K. The H<sub>2</sub> uptake decreases continuously when the O<sub>ot</sub>-layer is prepared at 300 K (Figure S4b), rather than exhibiting an abrupt decrease near ~0.4 ML as seen when the layer is prepared by heating (Figure S4a). The H<sub>2</sub> uptake is also lower for the O<sub>ot</sub>-layer prepared at 300 K vs. the layer prepared by heating. This behavior strongly supports the interpretation that H<sub>ot</sub> atoms, resulting from H<sub>2</sub> adsorption from the background, block subsequent H<sub>2</sub> adsorption at 85 K and that heating the initial O<sub>ot</sub>-layer above ~450 K causes an abrupt increase in the coverage of empty Ir<sub>cus</sub> sites by promoting the conversion of Hot atoms to OH groups.

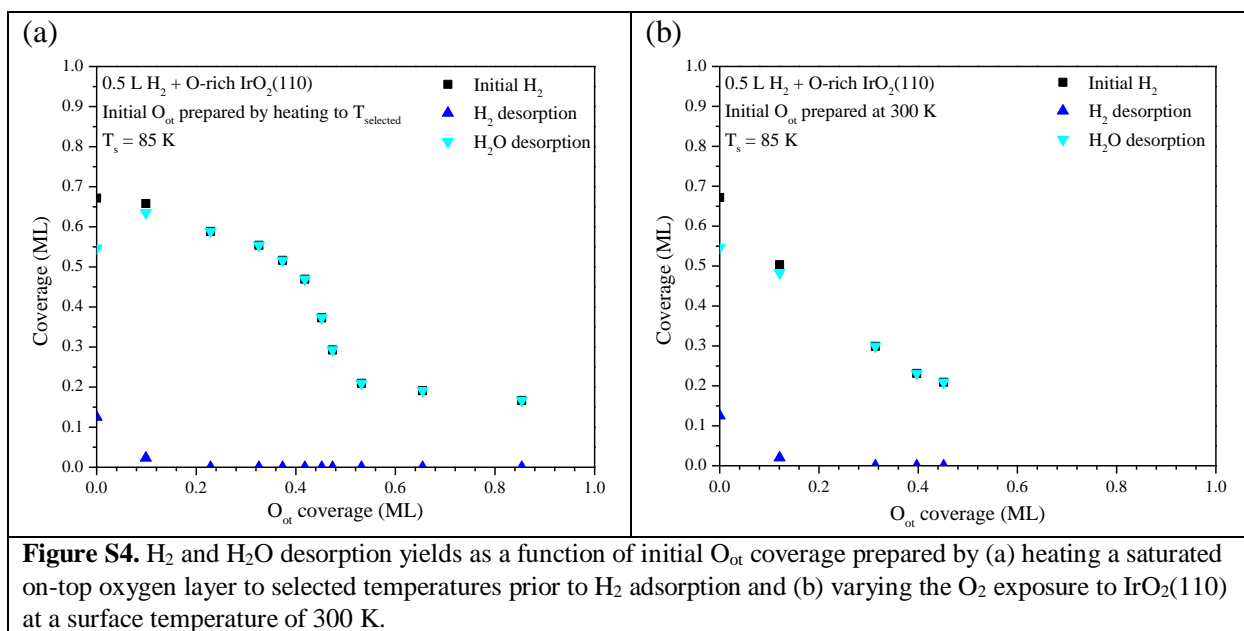

## O<sub>2</sub> dissociation pathway on s-IrO<sub>2</sub>(110)

Figure S4 shows the computed energy diagram and molecular images for dissociation of molecularly adsorbed O<sub>2</sub> on IrO<sub>2</sub>(110).

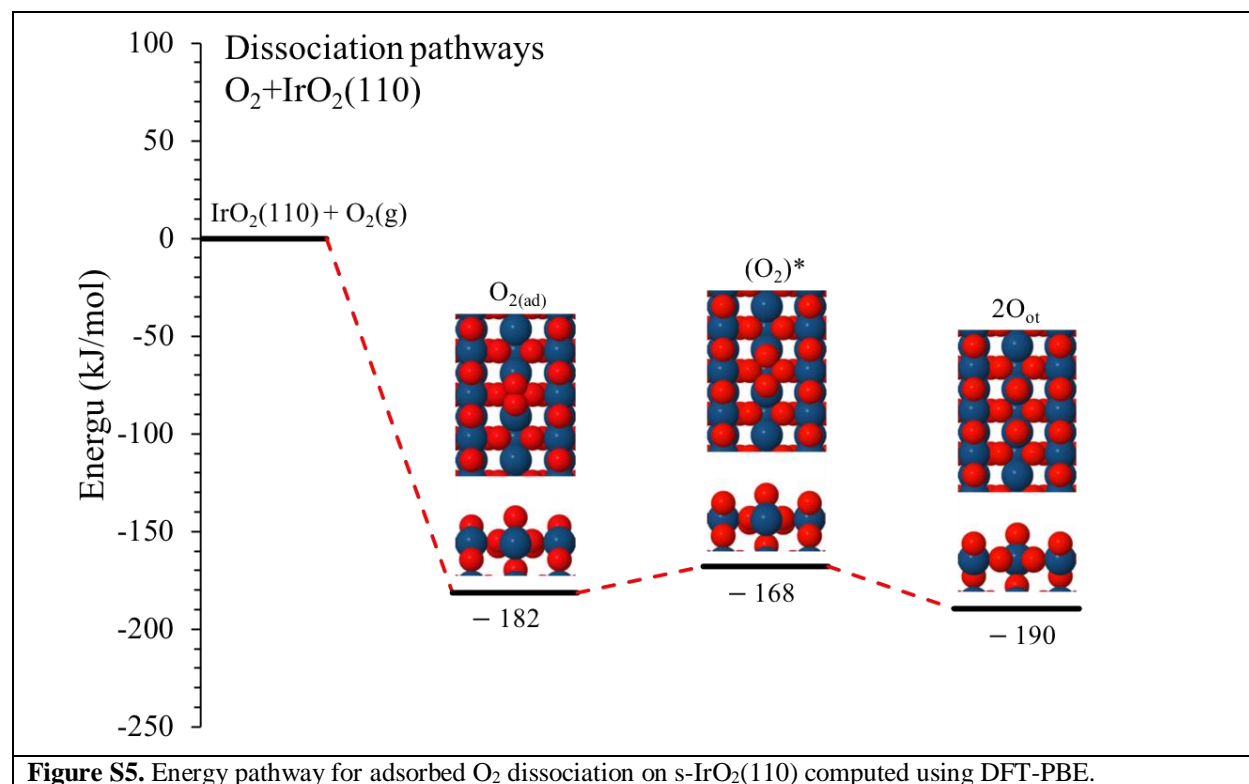



## Energy diagrams and molecular images for reactions in H<sub>2</sub> oxidation on O-rich IrO<sub>2</sub>(110)

Figures S6-S11 show energy diagrams and molecular images for the reaction steps identified as governing H<sub>2</sub> oxidation on O-rich IrO<sub>2</sub>(110) and summarized in Table 2 of the main manuscript.

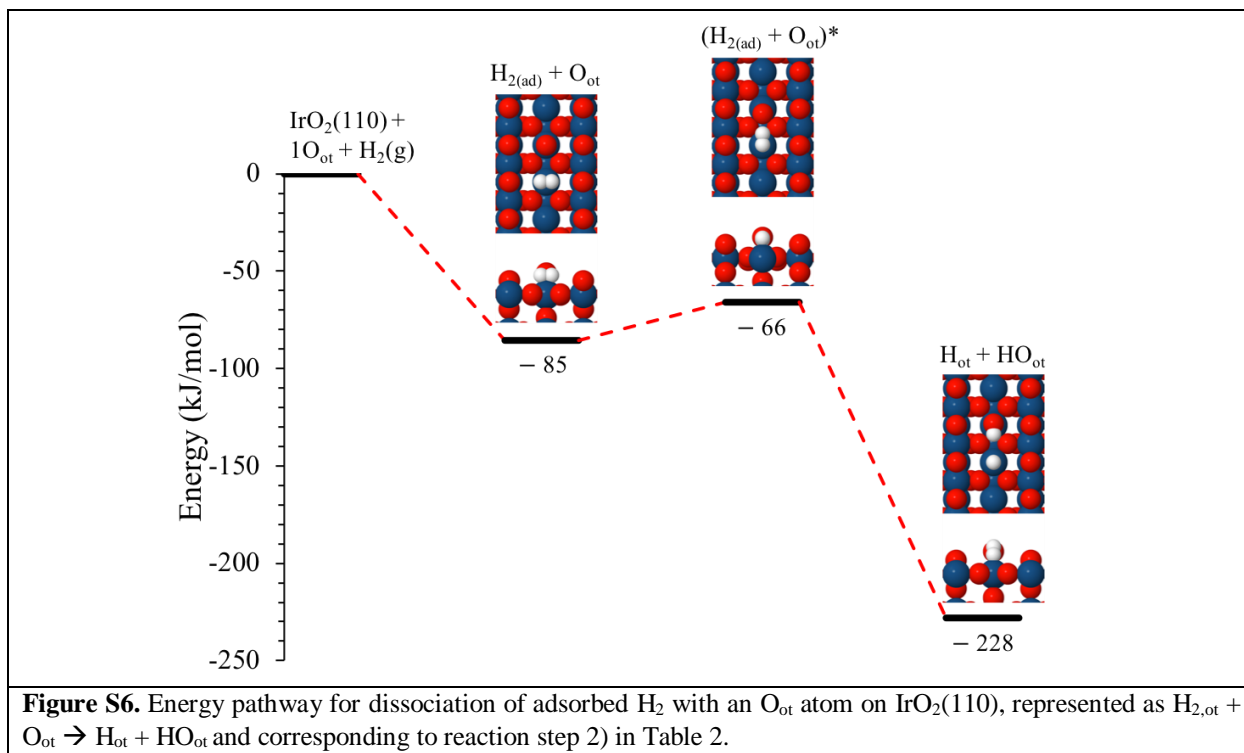

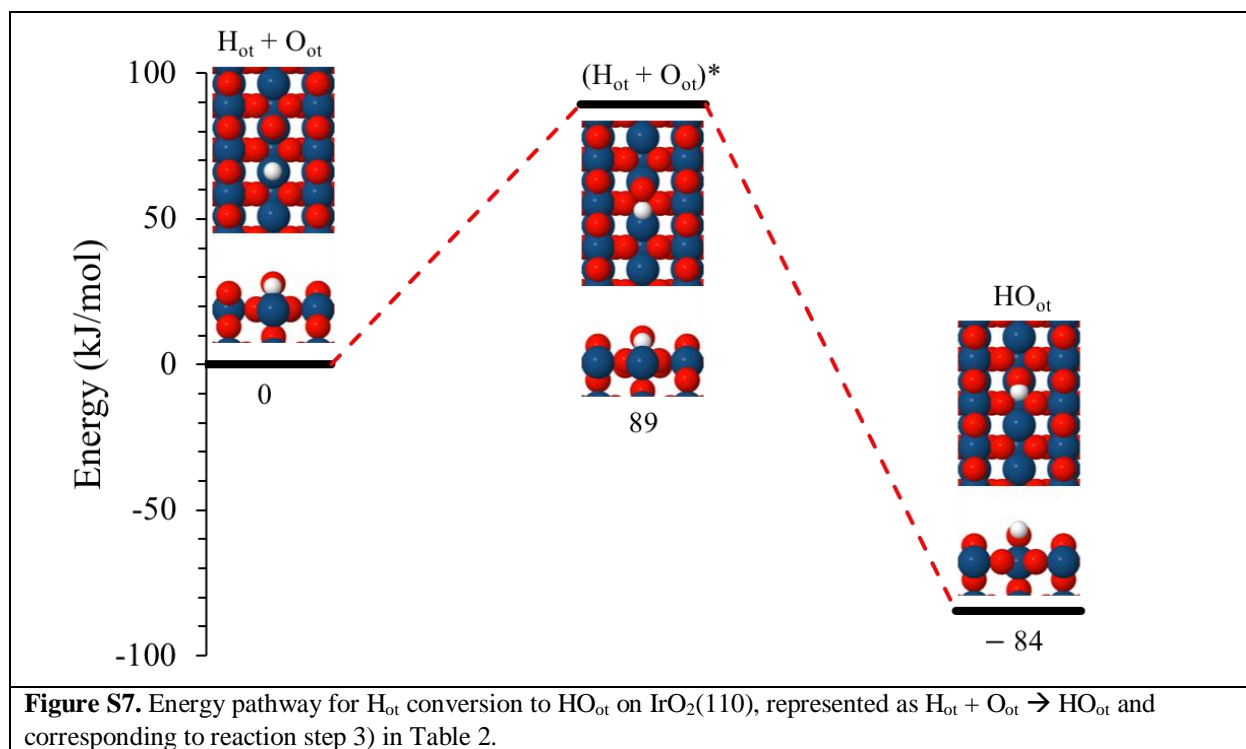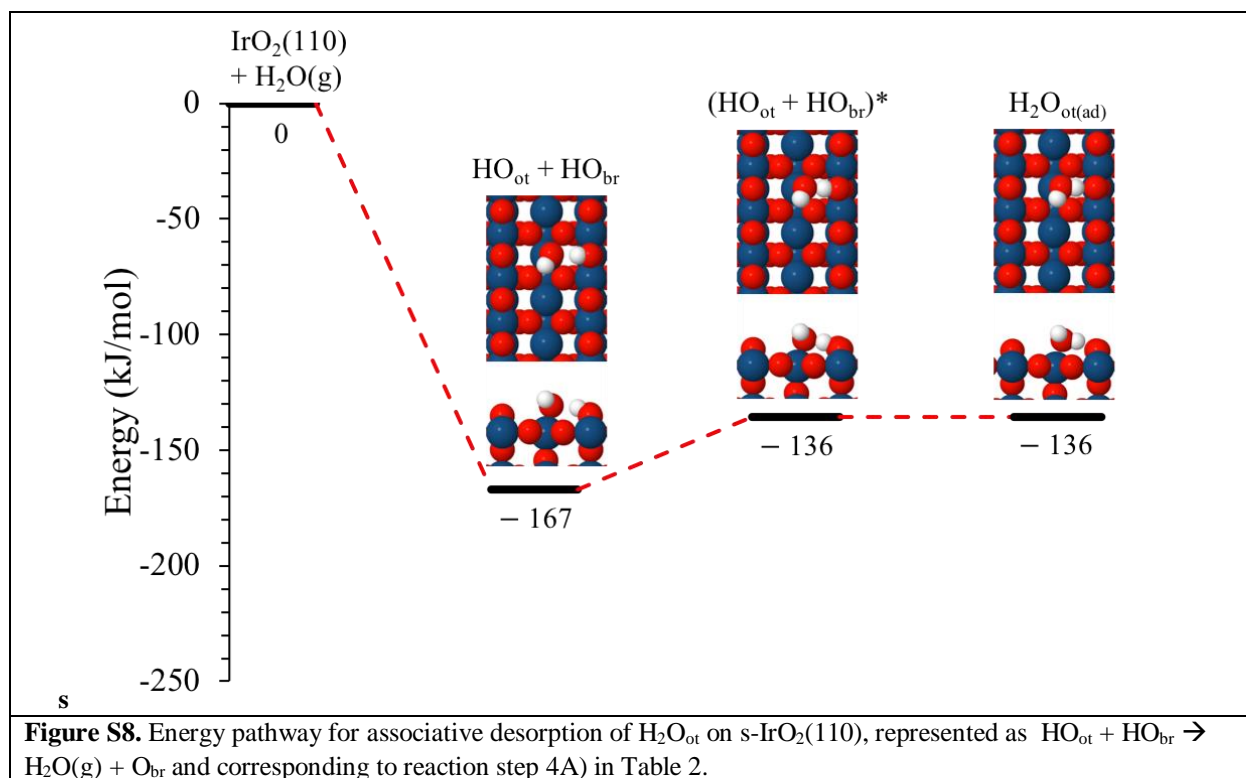

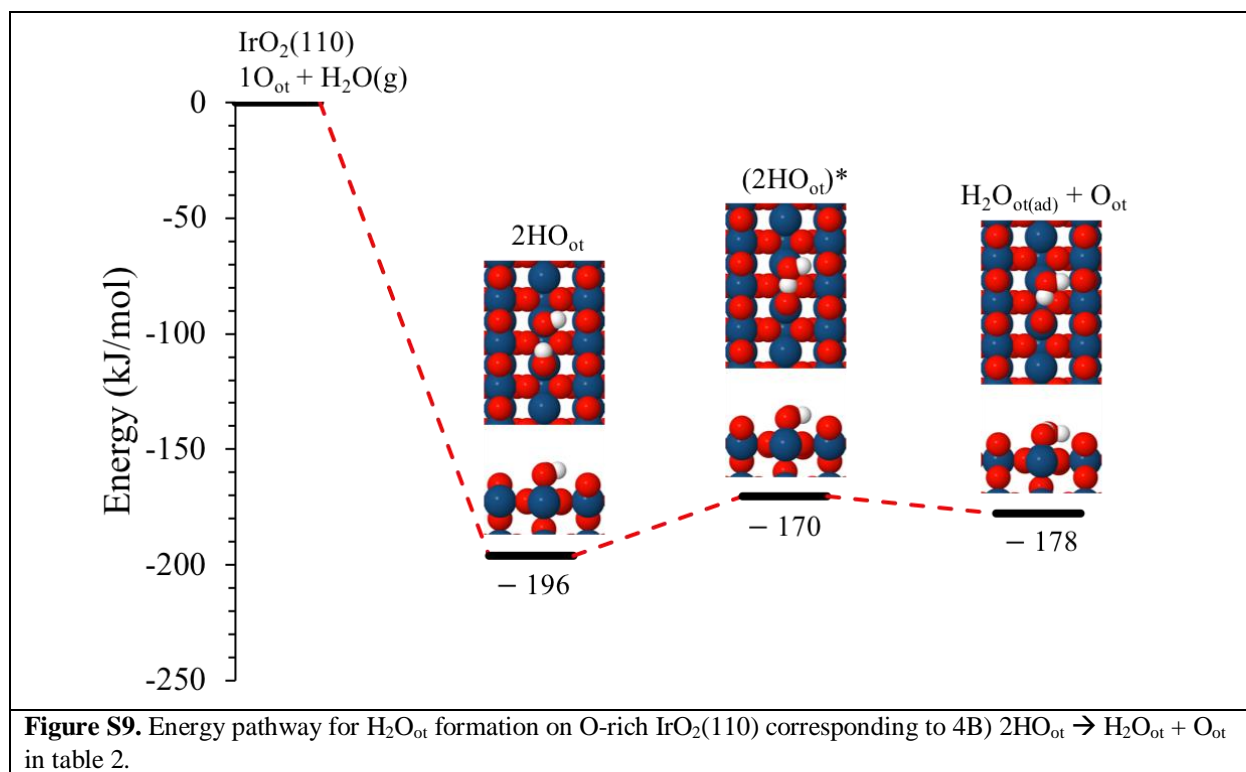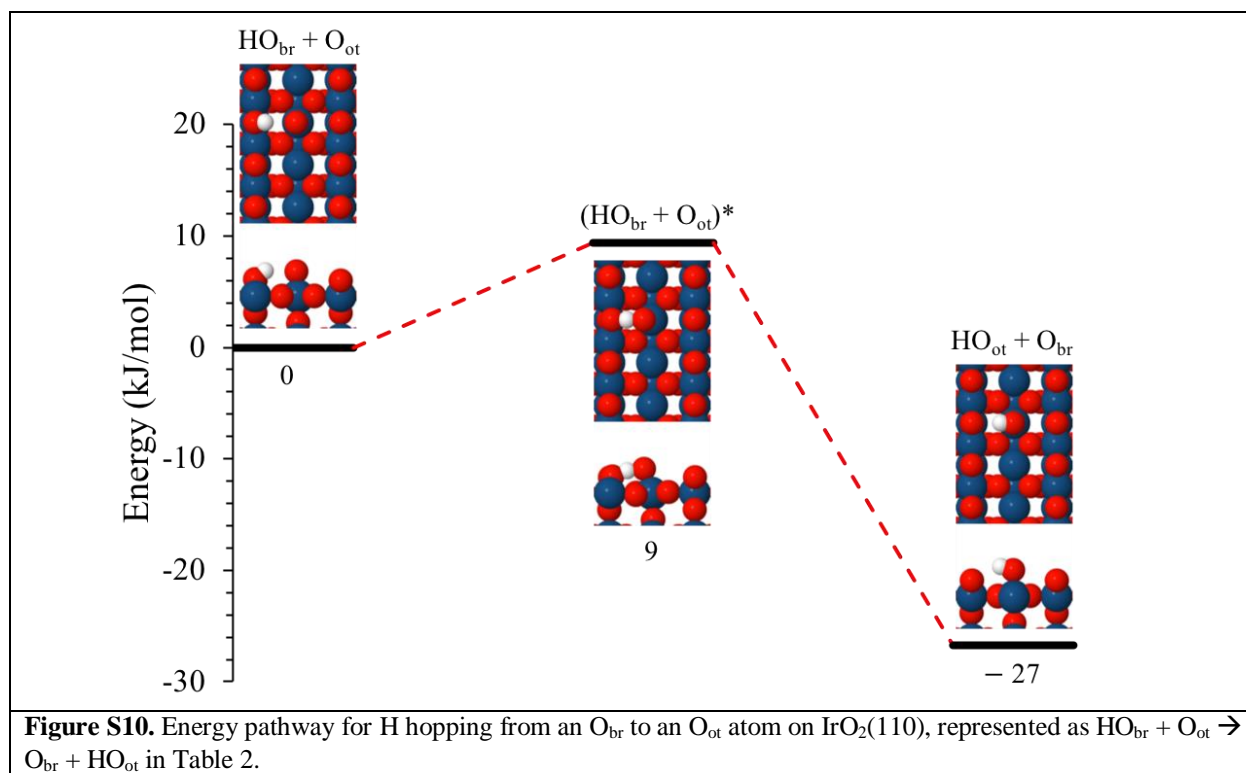

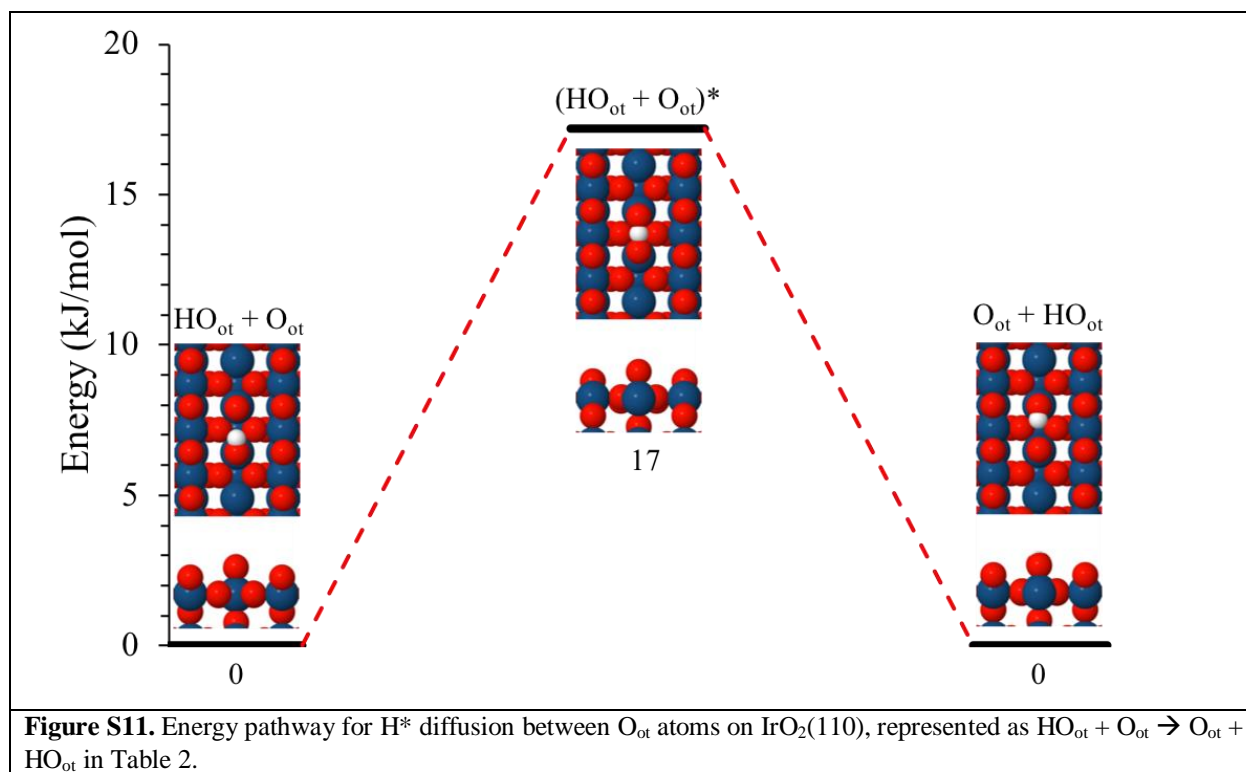

## References

1. Anic K, Bulchtiyarov AV, Li H, et al. CO Adsorption on Reconstructed Ir(100) Surfaces from UHV to mbar Pressure: A LEED, TPD, and PM-IRAS Study. *J Phys Chem C*. 2016;120(20):10838-10848.
2. Arman MA, Klein A, Ferstl P, et al. Adsorption of hydrogen on stable and metastable Ir(100) surfaces. *Surf Sci*. 2017;656:66-76.
3. Lobo A, Conrad H. Interaction of H<sub>2</sub>O with the RuO<sub>2</sub>(110) surface studied by HREELS and TDS. *Surf Sci*. 2003;523(3):279-286.
4. Kan HH, Colmyer RJ, Asthagiri A, et al. Adsorption of Water on a PdO(101) Thin Film: Evidence of an Adsorbed HO-H<sub>2</sub>O Complex. *J Phys Chem C*. 2009;113(4):1495-1506.
5. Mu RT, Cantu DC, Glezakou VA, et al. Deprotonated Water Dimers: The Building Blocks of Segmented Water Chains on Rutile RuO<sub>2</sub>(110). *J Phys Chem C*. 2015;119(41):23552-23558.
6. Mu RT, Cantu DC, Lin X, et al. Dimerization Induced Deprotonation of Water on RuO<sub>2</sub>(110). *J Phys Chem Lett*. 2014;5(19):3445-3450.
7. Parkinson GS. Iron oxide surfaces. *Surf Sci Rep*. 2016;71(1):272-365.
